# Supplementary material for: Main predictors in health-related quality of life in Chinese patients with type 2 diabetes mellitus
Source: Springer Nature journal article supplement (doi:10.1007/s11136-016-1324-4), 2016-06-14
Supplement: MOESM1 [file 10253570]

Supplementary table 1. Data completion rates of baseline characteristics

| Factor | Subjects (N = 1,826) | Factor | Subjects (N = 1,826) |
| --- | --- | --- | --- |
| **Socio-Demographic (%, n)** |  | **Clinical Characteristic (%, n)** |  |
| Gender | 100.00% (1,826) | Hyperlipidemia | 99.67 % (1,820) |
| Age | 100.00% (1,826) | Obesity | 95.84 % (1,750) |
| Marital Status | 86.86 % (1,586) | History of CVD Event | 100.00 % (1,826) |
| Smoking Status | 98.58 % (1,800) | Presence of CKD | 99.73 % (1,821) |
| Alcohol Status | 79.13 % (1,445) | Use of Anti-Hypertensive Drugs | 100.00 % (1,826) |
| Educational Level | 79.30 % (1,448) | Use of Insulin | 100.00 % (1,826) |
| Regular Exercise | 87.57 % (1,599) | Use of Oral Drugs | 100.00 % (1,826) |
| **Clinical Characteristic (%, n)** |  | Use of Lipid-Lowering Agents | 100.00 % (1,826) |
| Family History of DM | 100.00 % (1,826) | **Outcome measurements (%, n)** | |
| Duration of DM | 86.04 % (1,571) | SF12v2 PCS | 99.23 % (1,812) |
| Hyperglycaemia | 99.56 % (1,818) | SF12v2 MCS | 99.23 % (1,812) |
| Hypertension | 100.00 % (1,826) | SF-6D | 99.51 % (1,817) |

DM = Diabetes Mellitus; CVD = Cardiovascular Disease; CKD = Chronic Kidney Disease; PCS = Physical Component Summary; MCS = Mental Component Summary
